# Supplementary material for: Theoretical study on the photophysical properties of boron-fused double helicenes
Source: Royal Society of Chemistry journal article supplement (doi:10.1039/c7ra11476a), 2017-01-01
Supplement: c7ra11476a1.pdf [file c7ra11476a1.pdf]

## **Theoretical study on photophysical properties of boron-fused double helicenes**

Yanling Si,<sup>\*a</sup> Yan Cheng,<sup>b</sup> Nan Qu,<sup>a</sup> Xinyu Zhao,<sup>a</sup> and Guochun Yang<sup>\*c</sup>

a. College of Resource and Environmental Science, Jilin Agricultural University, Changchun 130118, China

b. Department of Ophthalmology, Second Hospital of Jilin University, Changchun, 132400, China

c. Centre for Advanced Optoelectronic Functional Materials Research and Key Laboratory for UV Light-Emitting Materials and Technology of Ministry of Education, Northeast Normal University, Changchun 130024, China

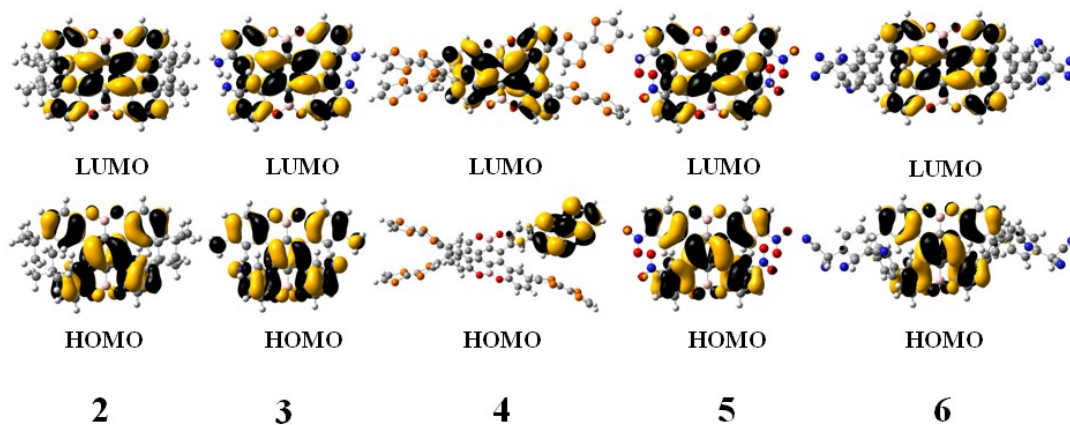

Fig. S1 HOMO and LUMO of compounds 2-6.

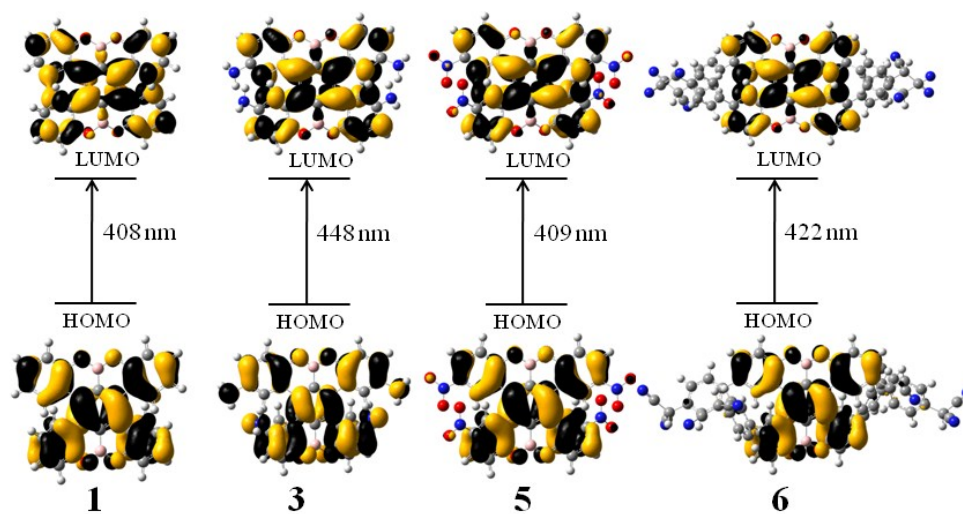

Fig. S2 Molecular orbital isosurfaces involved in the main electron transitions of compounds 1, 3, 5 and 6.

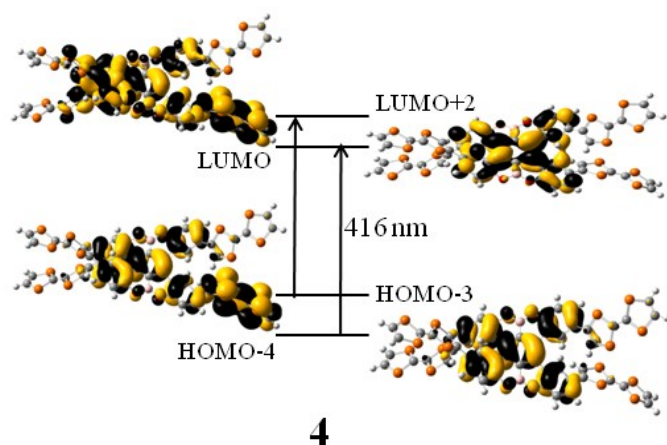

Fig. S3 Molecular orbital isosurfaces involved in the main electron transitions of compound 4.

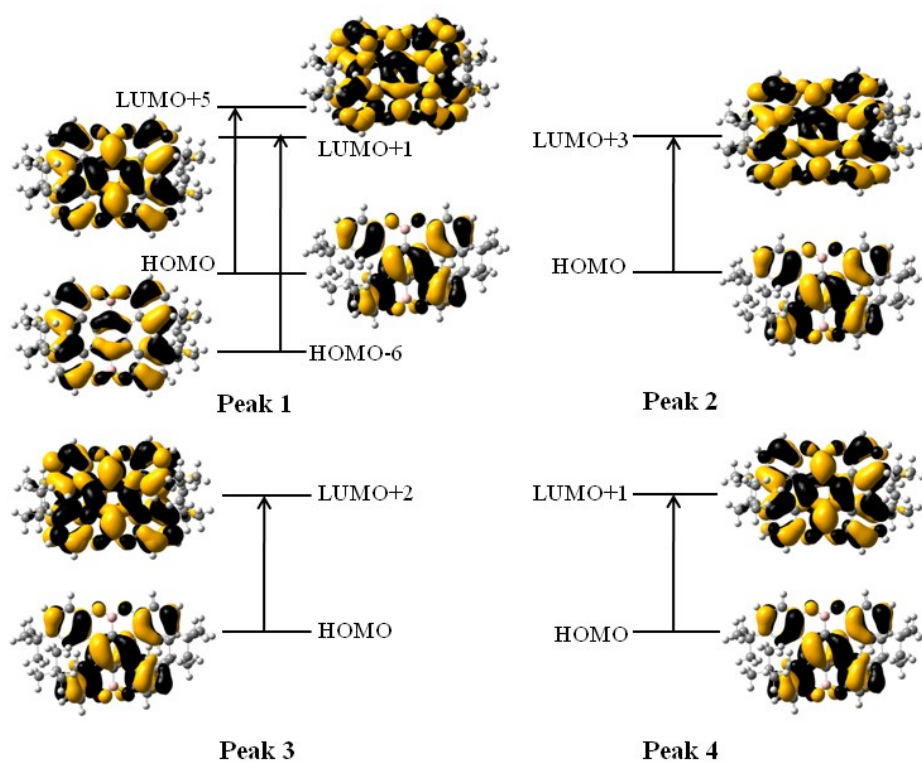

Fig. S4 Molecular orbitals involved into the main ECD transitions of compound 2.

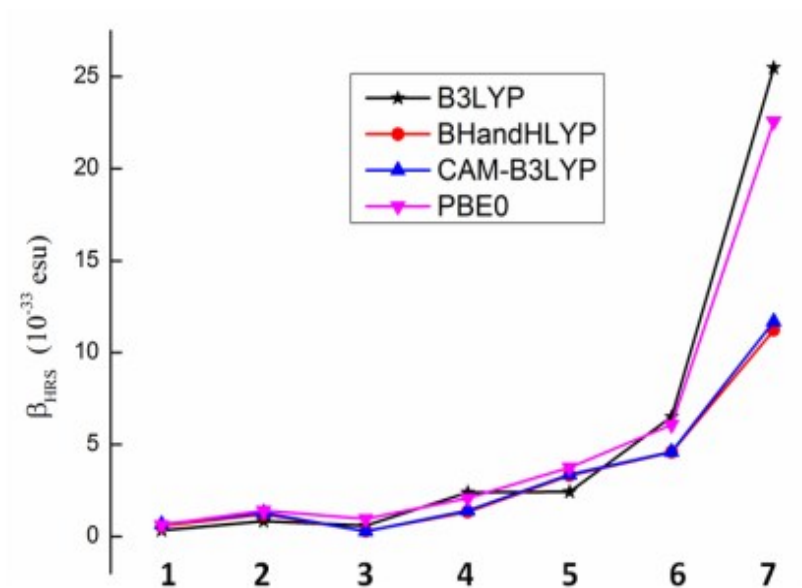

**Fig. S5** The calculated second-order NLO response values obtained from the four functionals (i.e. B3LYP, BHandHLYP, CAM-B3LYP and PBE0).

**Table S1.** Calculated absorption wavelength (nm) for compound **2** with the TDDFT method at the PBE0, B3LYP, Cam-B3LYP and BHandHLYP level, respectively, together with the experimental data.

| $\lambda_{\text{cal}}$<br>PBE0 | $\lambda_{\text{cal}}$<br>B3LYP | $\lambda_{\text{cal}}$<br>Cam-B3LYP | $\lambda_{\text{cal}}$<br>BHandHLYP | Exp. <sup>20</sup> |
|--------------------------------|---------------------------------|-------------------------------------|-------------------------------------|--------------------|
| 415                            | 432                             | 382                                 | 383                                 | 411                |

**Table S2.** The main concerned bond lengths and dihedral angles for compound **1** obtained by B3LYP and PBE0.

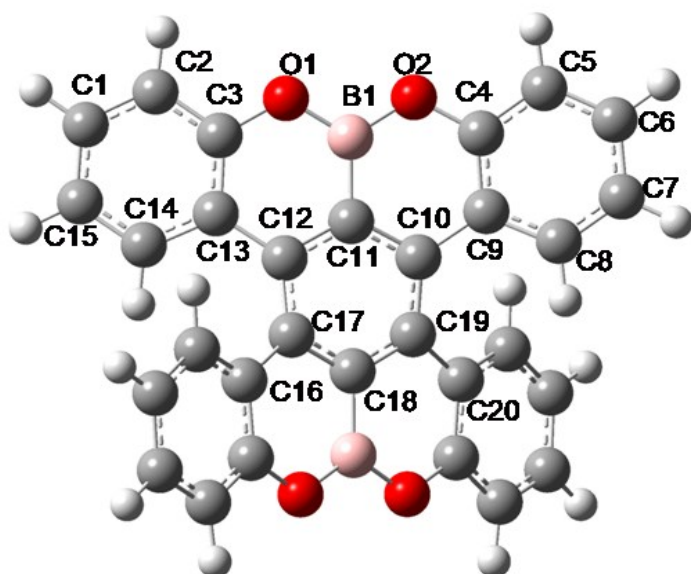

|              | Experiment <sup>20</sup> | B3LYP | PBE0  | <sup>a</sup> Di(B3LYP) | <sup>a</sup> Di(PBE0) |
|--------------|--------------------------|-------|-------|------------------------|-----------------------|
| Bond lengths |                          |       |       | 0.006 <sup>b</sup>     | 0.006 <sup>b</sup>    |
| C1-C2        | 1.380                    | 1.389 | 1.385 | 0.009                  | 0.005                 |
| C2-C3        | 1.388                    | 1.397 | 1.394 | 0.009                  | 0.006                 |
| C3-O1        | 1.384                    | 1.371 | 1.362 | -0.013                 | -0.022                |
| O1-B1        | 1.371                    | 1.370 | 1.367 | -0.001                 | -0.004                |
| B1-O2        | 1.371                    | 1.370 | 1.367 | -0.001                 | -0.004                |
| O2-C4        | 1.384                    | 1.371 | 1.362 | -0.013                 | -0.022                |
| C4-C5        | 1.388                    | 1.397 | 1.394 | 0.009                  | 0.006                 |
| C5-C6        | 1.380                    | 1.389 | 1.385 | 0.009                  | 0.005                 |
| C6-C7        | 1.390                    | 1.399 | 1.396 | 0.009                  | 0.006                 |
| C7-C8        | 1.379                    | 1.388 | 1.384 | 0.009                  | 0.005                 |
| C8-C9        | 1.408                    | 1.412 | 1.408 | 0.004                  | 0.000                 |
| C9-C10       | 1.476                    | 1.477 | 1.471 | 0.001                  | -0.005                |
| C10-C11      | 1.411                    | 1.415 | 1.410 | 0.004                  | -0.001                |
| C11-C12      | 1.410                    | 1.415 | 1.410 | 0.005                  | 0.000                 |
| C12-C13      | 1.476                    | 1.477 | 1.471 | 0.001                  | -0.005                |
| C13-C14      | 1.411                    | 1.412 | 1.408 | 0.001                  | -0.003                |
| C14-C15      | 1.381                    | 1.388 | 1.384 | 0.007                  | 0.003                 |
| C12-C17      | 1.424                    | 1.425 | 1.420 | 0.001                  | -0.004                |
| C10-C19      | 1.418                    | 1.425 | 1.420 | 0.007                  | 0.002                 |

|                 |        |        |        |                   |                   |
|-----------------|--------|--------|--------|-------------------|-------------------|
| Dihedral angles |        |        |        | 0.72 <sup>b</sup> | 0.72 <sup>b</sup> |
| C15-C14-C13-C12 | -177.8 | -177.5 | -177.6 | 0.30              | 0.20              |
| C13-C12-C17-C16 | -29.1  | -30.1  | -29.5  | -1.0              | -0.4              |
| C11-C12-C17-C16 | 153.1  | 152.7  | 153.2  | -0.4              | 0.1               |
| C7-C8-C9-C10    | -177.8 | -177.5 | -177.6 | 0.3               | 0.2               |
| C9-C10-C19-C20  | -31.3  | -30.1  | -29.5  | 1.2               | 1.8               |
| C9-C10-C19-C18  | 151.6  | 152.7  | 153.2  | 1.1               | 1.6               |

Note: <sup>a</sup> Difference is equal to calculation value minus experimental one; <sup>b</sup> the average deviation.

**Table S3.** The calculated excitation energies, oscillator strengths and rotational strengths for compound **1** in the gas phase at the TD-B3LYP/ 6-31+G(d) level.

| states | eV     | $\lambda^a$ | $f^b$  | R(length) <sup>c</sup> | R(velocity) <sup>c</sup> |
|--------|--------|-------------|--------|------------------------|--------------------------|
| 1      | 3.0374 | 408.20      | 0.3137 | -22.9109               | -22.8690                 |
| 2      | 3.3320 | 372.10      | 0.1326 | -10.9780               | -11.1988                 |
| 3      | 3.9441 | 314.36      | 0.0088 | -11.6785               | -13.8186                 |
| 4      | 3.9790 | 311.59      | 0.0000 | 0.0000                 | 0.0000                   |
| 5      | 4.1287 | 300.30      | 0.7960 | 38.7235                | 37.6812                  |
| 6      | 4.1541 | 298.46      | 0.0290 | 45.4575                | 44.8711                  |
| 7      | 4.1784 | 296.72      | 0.0685 | -269.3065              | -269.0754                |
| 8      | 4.2363 | 292.67      | 0.0037 | 4.7657                 | 4.4278                   |
| 9      | 4.3409 | 285.62      | 0.0747 | 58.7928                | 58.8044                  |
| 10     | 4.4194 | 280.54      | 0.0039 | -37.6095               | -37.6775                 |
| 11     | 4.4242 | 280.24      | 0.0056 | -6.2162                | -6.0301                  |
| 12     | 4.6016 | 269.44      | 0.0003 | 1.9994                 | 1.8345                   |
| 13     | 4.6578 | 266.19      | 0.0028 | 98.2963                | 83.7974                  |
| 14     | 4.6594 | 266.09      | 0.0000 | 0.0011                 | 0.0009                   |
| 15     | 4.6696 | 265.52      | 0.0105 | -39.8177               | -33.9864                 |
| 16     | 4.6867 | 264.55      | 0.0000 | 0.0000                 | 0.0000                   |
| 17     | 4.7052 | 263.50      | 0.0040 | -3.8650                | -3.5139                  |
| 18     | 4.8342 | 256.47      | 0.0000 | 0.0000                 | 0.0000                   |
| 19     | 4.8912 | 253.48      | 0.1312 | -15.7621               | -15.6281                 |
| 20     | 4.9634 | 249.80      | 0.0470 | 67.7661                | 64.8276                  |
| 21     | 5.0685 | 244.62      | 0.0000 | 0.0000                 | 0.0000                   |
| 22     | 5.2153 | 237.73      | 0.0102 | 7.7090                 | 7.5944                   |
| 23     | 5.2579 | 235.80      | 0.0100 | -5.3824                | -5.0732                  |
| 24     | 5.2908 | 234.34      | 0.0000 | 0.0000                 | 0.0000                   |
| 25     | 5.3395 | 232.20      | 0.0046 | -118.3632              | -119.6333                |
| 26     | 5.3672 | 231.00      | 0.0366 | 71.9733                | 67.2055                  |
| 27     | 5.4286 | 228.39      | 0.0000 | 0.0000                 | 0.0000                   |
| 28     | 5.4674 | 226.77      | 0.0027 | 2.5120                 | 2.1097                   |
| 29     | 5.4953 | 225.62      | 0.0000 | 0.0000                 | 0.0000                   |

|    |        |        |        |           |           |
|----|--------|--------|--------|-----------|-----------|
| 30 | 5.5227 | 224.50 | 0.0112 | -0.8186   | -0.8171   |
| 31 | 5.5630 | 222.87 | 0.0000 | 0.0000    | 0.0000    |
| 32 | 5.6023 | 221.31 | 0.0822 | 19.4237   | 19.3428   |
| 33 | 5.6304 | 220.20 | 0.0057 | -9.4311   | -9.0675   |
| 34 | 5.6474 | 219.54 | 0.0000 | -0.0003   | -0.0003   |
| 35 | 5.6980 | 217.59 | 0.1016 | -351.1712 | -341.7341 |
| 36 | 5.7143 | 216.97 | 0.0020 | 14.3071   | 13.2134   |
| 37 | 5.7566 | 215.38 | 0.1350 | 80.8398   | 79.2522   |
| 38 | 5.7974 | 213.86 | 0.0318 | 47.9891   | 46.7837   |
| 39 | 5.8170 | 213.14 | 0.0045 | 14.8833   | 14.9468   |
| 40 | 5.8474 | 212.03 | 0.0002 | -0.0248   | -0.0245   |
| 41 | 5.8476 | 212.03 | 0.1030 | -15.5834  | -15.4300  |
| 42 | 5.8555 | 211.74 | 0.4788 | 224.4538  | 220.1685  |
| 43 | 5.8865 | 210.62 | 0.1509 | -99.4823  | -97.4308  |
| 44 | 5.8940 | 210.36 | 0.0116 | 93.9044   | 90.0693   |
| 45 | 5.9098 | 209.80 | 0.0405 | -36.0440  | -34.6405  |
| 46 | 5.9117 | 209.73 | 0.0000 | -0.0006   | -0.0006   |
| 47 | 5.9380 | 208.80 | 0.0168 | -0.2442   | -0.2262   |
| 48 | 5.9785 | 207.38 | 0.0000 | 0.0001    | 0.0001    |
| 49 | 5.9868 | 207.10 | 0.0005 | -3.0361   | -2.8093   |
| 50 | 6.0026 | 206.55 | 0.0968 | -21.5322  | -20.5613  |
| 51 | 6.0036 | 206.52 | 0.2323 | 221.9836  | 214.0286  |
| 52 | 6.0328 | 205.52 | 0.0057 | 5.2569    | 4.8050    |
| 53 | 6.0695 | 204.27 | 0.0233 | -229.5323 | -230.5940 |
| 54 | 6.0733 | 204.15 | 0.0528 | -3.7735   | -3.5810   |
| 55 | 6.1231 | 202.49 | 0.0000 | -0.0003   | -0.0003   |
| 56 | 6.1337 | 202.14 | 0.0014 | 0.1632    | 0.1369    |
| 57 | 6.1651 | 201.11 | 0.0000 | -0.0001   | -0.0001   |
| 58 | 6.1784 | 200.67 | 0.0376 | -23.7002  | -22.6825  |
| 59 | 6.1835 | 200.51 | 0.0599 | -63.5343  | -60.6609  |
| 60 | 6.1889 | 200.33 | 0.0173 | -141.3005 | -136.1755 |
| 61 | 6.2014 | 199.93 | 0.0218 | 8.0098    | 8.3552    |
| 62 | 6.2168 | 199.43 | 0.0435 | 15.1027   | 15.3735   |
| 63 | 6.2328 | 198.92 | 0.0105 | -58.3597  | -58.3838  |
| 64 | 6.2441 | 198.56 | 0.0000 | 0.0012    | 0.0012    |
| 65 | 6.2473 | 198.46 | 0.0288 | 24.8104   | 23.3321   |
| 66 | 6.2513 | 198.33 | 0.0015 | 26.4011   | 27.9903   |
| 67 | 6.2567 | 198.16 | 0.0329 | -48.4204  | -45.4358  |
| 68 | 6.2645 | 197.92 | 0.0294 | 26.3704   | 24.9460   |
| 69 | 6.2753 | 197.57 | 0.0379 | 73.3035   | 68.9831   |
| 70 | 6.2944 | 196.97 | 0.0000 | 0.0003    | 0.0003    |
| 71 | 6.3122 | 196.42 | 0.0042 | -33.5558  | -30.6976  |
| 72 | 6.3428 | 195.47 | 0.0062 | 3.8766    | 4.0130    |
| 73 | 6.3538 | 195.13 | 0.0000 | -0.0059   | -0.0057   |
| 74 | 6.3600 | 194.94 | 0.0435 | -51.5035  | -49.2530  |
| 75 | 6.3625 | 194.87 | 0.5633 | -40.1803  | -39.6041  |
| 76 | 6.3739 | 194.52 | 0.0070 | -18.6825  | -18.2100  |
| 77 | 6.4018 | 193.67 | 0.1777 | 174.1860  | 171.7646  |
| 78 | 6.4131 | 193.33 | 0.0000 | -0.2582   | -1.0337   |

|     |        |        |        |          |          |
|-----|--------|--------|--------|----------|----------|
| 79  | 6.4221 | 193.06 | 0.0065 | -9.2991  | -8.0907  |
| 80  | 6.4243 | 192.99 | 0.0025 | 18.3082  | 14.7613  |
| 81  | 6.4419 | 192.47 | 0.0783 | -90.2354 | -91.2010 |
| 82  | 6.4664 | 191.74 | 0.0000 | -0.0001  | -0.0001  |
| 83  | 6.4757 | 191.46 | 0.0506 | 12.6260  | 12.3388  |
| 84  | 6.4812 | 191.30 | 0.0244 | 37.8173  | 38.2368  |
| 85  | 6.5042 | 190.62 | 0.0000 | 0.0000   | 0.0000   |
| 86  | 6.5294 | 189.88 | 0.0000 | 0.0000   | 0.0000   |
| 87  | 6.5378 | 189.64 | 0.0000 | 0.0000   | 0.0000   |
| 88  | 6.5687 | 188.75 | 0.0149 | -16.6698 | -15.8300 |
| 89  | 6.5721 | 188.65 | 0.0044 | -30.6836 | -27.7350 |
| 90  | 6.5823 | 188.36 | 0.0756 | 154.4205 | 154.5330 |
| 91  | 6.6153 | 187.42 | 0.0070 | 12.0308  | 12.1214  |
| 92  | 6.6274 | 187.08 | 0.0000 | 0.0000   | 0.0000   |
| 93  | 6.6361 | 186.83 | 0.0764 | -26.8702 | -26.5477 |
| 94  | 6.6379 | 186.78 | 0.0111 | 21.2082  | 20.1858  |
| 95  | 6.6401 | 186.72 | 0.0000 | -0.0701  | -0.0665  |
| 96  | 6.6407 | 186.70 | 0.0040 | -91.0725 | -86.2831 |
| 97  | 6.6545 | 186.32 | 0.0764 | 43.7191  | 42.8066  |
| 98  | 6.6587 | 186.20 | 0.0024 | -2.9533  | -2.7341  |
| 99  | 6.6887 | 185.36 | 0.0000 | 0.0000   | 0.0000   |
| 100 | 6.6984 | 185.09 | 0.0122 | -7.6319  | -6.9513  |

<sup>a</sup> $\lambda$  in nm. <sup>b</sup>Oscillator Strengths. <sup>c</sup>R values (in  $10^{-40}$  esu<sup>2</sup>cm<sup>2</sup>) using the velocity-gauge representation and length-gauge representation of the electric dipole operator.
